# Supplementary material for: Transcriptome Sequencing Reveals Novel Candidate Genes for Cardinium hertigii-Caused Cytoplasmic Incompatibility and Host-Cell Interaction
Source: PubMed Central journal article supplement (PMC5698495; doi:10.1128/msystems.00141-17), 2017-11-21
Supplement: sys006172150st1.pdf [file sys006172150st1.pdf]

**Table S1. Potential novel *cEper1* transcripts and putative antisense RNAs, calculated with ReadXplorer.** The parameter ‘number of read starts’ counts the number of reads and filters low coverage regions with a number of reads below a certain threshold. The threshold used to detect novel transcripts was set to 10 reads minimum. ‘Coverage increase’ indicates the coverage increase in percent from one position to the neighboring one (for the detection of novel transcripts, the threshold was set to a minimum of 50% increase from the start of the transcript to the position before). ‘Transcript stop’ indicates the position at the chromosome where the putative transcript ends.

| Position          | Strand | Number of read starts | Coverage increase (%) | Transcript stop | Annotated <i>Cardinium</i> asRNA gene (locus_tag)  | Sequence of the novel transcript                                                                                                                                                                                                                                                                                                                                                                                                                                                                                              |
|-------------------|--------|-----------------------|-----------------------|-----------------|----------------------------------------------------|-------------------------------------------------------------------------------------------------------------------------------------------------------------------------------------------------------------------------------------------------------------------------------------------------------------------------------------------------------------------------------------------------------------------------------------------------------------------------------------------------------------------------------|
| <i>Chromosome</i> |        |                       |                       |                 |                                                    |                                                                                                                                                                                                                                                                                                                                                                                                                                                                                                                               |
| 24969             | Fwd    | 17                    | 114                   | 25444           | asRNA (CAHE_0024, putative UvrD-like DNA helicase) | ATAACAGCTTTACGCATGGTTGAAGATTCCACCAACTGCAAGACTTTT<br>CCTACACCAAAAATGAAGATGTTGGACAGTATGGCCAACCTGTATAGC<br>ACTAGGATCAGTAGGAATGCGTAGTCTAGCAGGTGCCACCATGGG<br>GCCAATAGTGCGGATCGGTTTGTGGACTGCTTTTGGGTGGCCATAGG<br>CTTACCAGTATGGAGCGTATCCGTCGCTACCCTTTTAGCCATAGCTTT<br>GGTTGCCGTATGGTCCATCCAACCCATCTCTTTAAAAAACGACTTGG<br>CTGAACATTGGCTAATTTGCCAAATCGGTATCTGCTAATGCATAAGA<br>CAGCGTTAATTTTAGTTGGGCACGGGTAACAGCTACGTAAGAAGAC<br>GCCTTTCTTCTTAAGTCTGCTTTGCTGCCAACATCATAGCAGAAG<br>GGAAGAGCTCTTCTCCATGCCTACCAGGTATACGCATTTAAATTCTA<br>G |
| 149205            | Fwd    | 28                    | 216                   | 149259          |                                                    | ATACTAGAGGTAATACTTACAACACCTCGCATGCTTACATTGGATTTA<br>ATCTTCC                                                                                                                                                                                                                                                                                                                                                                                                                                                                   |
| 149249            | Rev    | 322                   | 169                   | 148780          |                                                    | GGGGATGGCCATGGGGCTCTATTTAAAGTTAATAGCTAACGCAGCAT<br>AAAGGGCGTACCTGATTAAGTGGAGCTGGAGGGAATCGAACCCCTCGT<br>CCGAACAAGGAAACCACAACGCTTTCTACATGCTTAGCAACTGTTTAT<br>TGTCGGCGCAACCAAGGTCAGCCACTCACCTGATGTTACGCTTATGCC<br>CGGTTATGATTTATGCGGCCATCACGCACCTGACCACACTAGTGCTAT<br>CCATCGATGCCCTATGCTGATCCGATAACACAAAAACCAGCGGGAC<br>AAATCCCCTTAATCTATCGATTAAGCAGCCATACGCAATTCATCGTC<br>CTCTTCTTCTTTTTCGAAGCGCAACAAATTTGCAACGGCGGGAATT<br>ATTGATTACAGCTAAGTTGCCGTTTACGGATTGTGTAAGTTTATACT<br>AGAGGTAATACTTACAACACCTCGCATGCTTACATTGGAT         |
| 260920            | Rev    | 26                    | 325                   | 260680          |                                                    | TTCCCTATTCCTGTATAGGCCTTTAAAGGGTTCTTAAAGATAGGAAG<br>CCTATCGTTAACGCCTTGGCGTGGCCTAAATAGATGGTTAGGTAGGGC<br>TAGCTGCTACTCAATAATTTCAATATCTCAATGTTATAGGCAGCAGAT<br>GCATAAGAGAAAGCAGAATTTCCGGATCTATCCATATTTCTTCTTT<br>GCCTTTTATAGCTATCAACTCCCTAGCAGACTCTATATTATTGTGATTA                                                                                                                                                                                                                                                                |
| 269073            | Fwd    | 33                    | 236                   | 269139          | asRNA (CAHE_rRNA3)                                 | AACTGTCTCAGCGTTCTGAACCCAGCTCGCGTGCCACTTTAATGGG<br>CGAACAGCCCAACCCCTTGG                                                                                                                                                                                                                                                                                                                                                                                                                                                        |
| 269670            | Fwd    | 15                    | 125                   | 269753          | asRNA (CAHE_rRNA3)                                 | TCGTTACACCATTCGTGCAGGTCGGAACCTTACCCGACAAGGAATTCG<br>CTACCTTAGGACCGTCAAGGTTACGGCCGCGGTTTA                                                                                                                                                                                                                                                                                                                                                                                                                                      |

|                |     |     |     |        |                                                                        |                                                                                                                                                                                                                                                                                                                                                                                                                                              |
|----------------|-----|-----|-----|--------|------------------------------------------------------------------------|----------------------------------------------------------------------------------------------------------------------------------------------------------------------------------------------------------------------------------------------------------------------------------------------------------------------------------------------------------------------------------------------------------------------------------------------|
| 312654         | Fwd | 31  | 135 | 312789 |                                                                        | TTTGATGGATAAAATATACATCAAACCCTGTTAAAAAGTTTGGAAAGC<br>ACTGTTTATAGATGACGCACTAAGCCATTTAGCACGGAATCTAAGGG<br>GTGGCTTTTGTTTTTCCAACCTGCAAGGAGCGTCTTCAAAAC                                                                                                                                                                                                                                                                                            |
| 409381         | Rev | 69  | 141 | 409065 |                                                                        | TTATGCGTTTTATAAGTCAGAACAAAGTATGCATACATTTTACTTGCT<br>AAAGTAAAAACATTTGTTTCGCTAGATGGTTGTGTAGGCTTGTGTAA<br>TTCAAAAGGAACCATTAACATTAATAGTGGACACTATTGACACATAAAAT<br>AAGAAATAGCAAACCCACAGCCAGCTAAAAACAAAATAAGCTAAG<br>GTATGATAGTTGTATTATGGACAACCTGGCATCGCTAATGTAGTTGGCT<br>TATTTTTGATTTTTTAAGATGTAGGTGCCACTTAGAAAAGGGCTAAAT<br>GAGGTAAGCAATAAAAAAGATAACGTAAT                                                                                         |
| 548516         | Rev | 899 | 110 | 548390 |                                                                        | TACCCTAATAAGCTTTGGTAAAAACTGGCGCTCGAGGATGTTGGAGCG<br>GATGAAAAAACAAGCCGAGTATCGCGCTGCTGCAACCACTTTACCC<br>TTGTTCCTTTCCAGGCTGGGGGATTTAGTAGG                                                                                                                                                                                                                                                                                                       |
| 630807         | Rev | 15  | 250 | 631033 | asRNA (CAHE_0614,<br>putative exported protein<br>of unknown function) | TACCTCGAAGACCCAGCCGCTATCTCATCAAAAATTACTACAACCAGA<br>TAGTGCGTATAGTTCCATTATATCTAGCCCAGAGAAAAACAAAGCAA<br>CGATTAAGAACTTGCTGCGTTAGAACATGCCTTTTAAAAGGTTAGCAA<br>GTAATTCTCAAGAAGTACGAAAGCTATTATCACGTGAGATGCATCCA<br>TACCACAACCATTCGATCGAATCTATAACAATC                                                                                                                                                                                              |
| 723650         | Fwd | 33  | 132 | 724049 | asRNA (CAHE_0705,<br>protein of unknown<br>function)                   | TACGGCTCCATAGTAGCGCTAAGCGCATATAGCTGTTTTGACAAACCG<br>ACCCCTCAAATAACACTAACCATTCAGGTAATAAAAAATTGAAAAG<br>AGGTGGATCGAAAAATCTAGATGCTTCAACAAAAATTGGCACAGCAA<br>CAAATGGAGCAGCAGCAACAAACGGAACAGTAACAGCAACAGAAAA<br>CGGAACAGAAACAAGACGATCTAAATAAACAAACAAAGAAATCAGG<br>AAAGGAGGCATCTTAAATGAGAAAAATGCATCAAAGATAGTATAGTA<br>GTAGAAGTACAGATAAAACTAGAAAAGTAAACGAAGTACTAGATAA<br>AGCTTTAACAAATAACACTATATAAGCTTATTGTTTTTCCATTCTTA<br>CTCTTTGGTGATTATAGTAAAAA |
| 728318         | Fwd | 68  | 262 | 728367 |                                                                        | TAATTAGTTTGGTATAGTGTGTTGTATACAGCATATTTTTTTGTTACGA<br>G                                                                                                                                                                                                                                                                                                                                                                                       |
| 860835         | Fwd | 20  | 100 | 860940 |                                                                        | TAAATATAGATCCAAATCTACTAAAAGGGGTCATTTGACTCAAAGC<br>CCGGTTTGTCTGATTTTAGTTATTAACCCTTGTACCCAATGTCTTCT<br>GTATGATCCT                                                                                                                                                                                                                                                                                                                              |
| <b>Plasmid</b> |     |     |     |        |                                                                        |                                                                                                                                                                                                                                                                                                                                                                                                                                              |
| 47119          | Fwd | 463 | 265 | 47231  | asRNA (CAHE_p0052,<br>protein of unknown<br>function)                  | CTTTTGTGATCATAAGATTATTTTAAATCCCTTGAAGGCTAATTCTTA<br>CATCTAATCTGGTCCCAACCAAAAATAAAAATAAGAACTAGCTTTCTTT<br>GGGAGGCTAGTTTTCT                                                                                                                                                                                                                                                                                                                    |
| 32541          | Rev | 40  | 134 | 32406  | asRNA(CAHE_p0036,<br>protein of unknown<br>function)                   | GCTATTTCTTATTGATTTTGGTTGCGAATCCAGGTTAAATGTGAGGA<br>ATAGCCTTCTAAGGGATTAACAACAAAAGTATGTTGACAAAAGAAA<br>AAATCCTTGAAGGAGGAGGAGAGGGACACCTCATCCGC                                                                                                                                                                                                                                                                                                  |
