# Supplementary material for: Transcriptome Sequencing Reveals Novel Candidate Genes for Cardinium hertigii-Caused Cytoplasmic Incompatibility and Host-Cell Interaction
Source: PubMed Central journal article supplement (PMC5698495; doi:10.1128/msystems.00141-17), 2017-11-21
Supplement: sys006172150st3.pdf [file sys006172150st3.pdf]

**Table S3. 30 cEper1 genes that were highest transcribed in male wasps are listed and sorted by the fold-change compared to their expression in female wasps. Genes meeting the DE criteria ( $p < 0.05$  and multiple testing correction of FDR < 10%) are highlighted in bold.**

| Locus tags from Penz et al., 2012 <sup>1</sup> | Current GenBank locus tag <sup>2</sup> | Description                           | Mean cEper1 expression in males | Mean cEper1 expression in females | Fold change  | p-value      | FDR value    |
|------------------------------------------------|----------------------------------------|---------------------------------------|---------------------------------|-----------------------------------|--------------|--------------|--------------|
| CAHE_p0035                                     | AL022_RS04060                          | hypothetical protein                  | 450.19                          | 158.52                            | 0.352        | 0.152        | 0.490        |
| CAHE_0088                                      | AL022_RS00410                          | hypothetical protein                  | 1.58                            | 0.57                              | 0.363        | 0.707        | 0.912        |
| CAHE_0416                                      | AL022_RS01910                          | hypothetical protein                  | 7.29                            | 2.93                              | 0.402        | 0.186        | 0.528        |
| CAHE_p0059                                     | AL022_RS04155                          | hypothetical protein                  | 409.06                          | 180.09                            | 0.44         | 0.369        | 0.735        |
| -                                              | AL022_RS02750                          | hypothetical protein                  | 17.85                           | 7.96                              | 0.446        | 0.059        | 0.341        |
| -                                              | AL022_RS01010                          | hypothetical protein                  | 7.08                            | 3.32                              | 0.47         | 0.235        | 0.588        |
| CAHE_p0063                                     | AL022_RS04170                          | transposase                           | 1142.75                         | 551.01                            | 0.482        | 0.242        | 0.601        |
| <b>CAHE_p0027</b>                              | <b>AL022_RS04035</b>                   | <b>hypothetical protein</b>           | <b>235.71</b>                   | <b>117.67</b>                     | <b>0.499</b> | <b>0.001</b> | <b>0.052</b> |
| CAHE_0539                                      | AL022_RS02470                          | hypothetical protein                  | 9.83                            | 4.96                              | 0.505        | 0.156        | 0.496        |
| CAHE_p0049                                     | AL022_RS04115                          | hypothetical protein                  | 1191.93                         | 602.62                            | 0.506        | 0.314        | 0.699        |
| CAHE_p0037                                     | AL022_RS04070                          | hypothetical protein                  | 329                             | 170.11                            | 0.517        | 0.515        | 0.819        |
| CAHE_0552                                      | AL022_RS02525                          | hypothetical protein                  | 16.61                           | 8.66                              | 0.521        | 0.132        | 0.462        |
| -                                              | AL022_RS04150                          | transposase                           | 1846.87                         | 965.05                            | 0.523        | 0.335        | 0.721        |
| -                                              | AL022_RS03860                          | hypothetical protein                  | 15.29                           | 8.23                              | 0.538        | 0.115        | 0.452        |
| <b>CAHE_p0026</b>                              | <b>AL022_RS04030</b>                   | <b>RING domain containing protein</b> | <b>1491.23</b>                  | <b>816.33</b>                     | <b>0.547</b> | <b>0.001</b> | <b>0.062</b> |
| CAHE_0385                                      | AL022_RS01775                          | hypothetical protein                  | 48.04                           | 26.65                             | 0.555        | 0.019        | 0.282        |

|                  |                      |                             |               |               |              |              |              |
|------------------|----------------------|-----------------------------|---------------|---------------|--------------|--------------|--------------|
| CAHE_0663        | AL022_RS03030        | hypothetical protein        | 16.98         | 9.55          | 0.562        | 0.128        | 0.458        |
| <b>CAHE_0544</b> | <b>AL022_RS02490</b> | <b>hypothetical protein</b> | <b>459.68</b> | <b>259.51</b> | <b>0.565</b> | <b>0.002</b> | <b>0.095</b> |
| CAHE_0542        | AL022_RS02485        | hypothetical protein        | 465.55        | 264.74        | 0.569        | 0.043        | 0.312        |
| CAHE_0605        | AL022_RS02755        | membrane protein            | 58.74         | 33.44         | 0.569        | 0.032        | 0.293        |
| CAHE_0755        | AL022_RS03470        | thioredoxin                 | 592.61        | 338.89        | 0.572        | 0.003        | 0.114        |
| CAHE_0735        | AL022_RS03370        | hypothetical protein        | 172.35        | 100.46        | 0.583        | 0.003        | 0.114        |
| CAHE_p0051       | AL022_RS04125        | hypothetical protein        | 550.86        | 321.77        | 0.584        | 0.255        | 0.610        |
| CAHE_0319        | AL022_RS01445        | hypothetical protein        | 95.22         | 56.62         | 0.595        | 0.019        | 0.282        |
| CAHE_0718        | AL022_RS03290        | iron-dependent repressor    | 229.37        | 138.59        | 0.604        | 0.249        | 0.607        |
| CAHE_0732        | AL022_RS03355        | hypothetical protein        | 309.35        | 187.25        | 0.605        | 0.009        | 0.217        |
| CAHE_p0022       | AL022_RS04010        | hypothetical protein        | 57.41         | 34.91         | 0.608        | 0.175        | 0.518        |
| CAHE_0666        | AL022_RS03045        | hypothetical protein        | 164.99        | 101.21        | 0.613        | 0.019        | 0.282        |
| CAHE_0787        | AL022_RS03655        | integrase                   | 246.82        | 152.3         | 0.617        | 0.005        | 0.16         |
| CAHE_p0040       | AL022_RS04085        | hypothetical protein        | 846.49        | 524.29        | 0.619        | 0.145        | 0.483        |

<sup>1</sup> Penz T, Schmitz-Esser S, Kelly SE, Cass BN, Muller A, Woyke T, Malfatti SA, Hunter MS, Horn M. 2012. Comparative genomics suggests an independent origin of cytoplasmic incompatibility in *Cardinium hertigii*. PLoS Genet 8(10): e1003012. Genbank accession numbers: HE983995 and HE983996

<sup>2</sup> Genbank accession numbers: NC\_018605.1 and NC\_018606.1
