# Supplementary material for: Transcriptome Sequencing Reveals Novel Candidate Genes for Cardinium hertigii-Caused Cytoplasmic Incompatibility and Host-Cell Interaction
Source: PubMed Central journal article supplement (PMC5698495; doi:10.1128/msystems.00141-17), 2017-11-21
Supplement: sys006172150st4.pdf [file sys006172150st4.pdf]

**Table S4. 30 cEper1 genes that were highest transcribed in female wasps are listed and sorted by the fold-change compared to their expression in male wasps. Genes meeting the DE criteria ( $p < 0.05$  and multiple testing correction of FDR < 10%) are highlighted in bold.**

| Locus tags from Penz et al., 2012 <sup>1</sup> | Current GenBank locus tag <sup>2</sup> | Description                                       | Mean cEper1 expression in males | Mean cEper1 expression in females | Fold change  | p-value      | FDR value    |
|------------------------------------------------|----------------------------------------|---------------------------------------------------|---------------------------------|-----------------------------------|--------------|--------------|--------------|
| CAHE_0238                                      | AL022_RS01105                          | DNA gyrase subunit A                              | 587                             | 1244.15                           | 2.12         | 0.002        | 0.114        |
| CAHE_0680                                      | AL022_RS03115                          | Inversin protein alternative isoform, putative    | 817.92                          | 1670.68                           | 2.043        | 0.051        | 0.338        |
| CAHE_0478                                      | AL022_RS02230                          | tRNA 2-thiouridine(34) synthase MnmA              | 188.77                          | 366.76                            | 1.943        | 0.003        | 0.114        |
| CAHE_0512                                      | AL022_RS02375                          | hypothetical protein                              | 13.15                           | 25.52                             | 1.94         | 0.044        | 0.312        |
| CAHE_0241                                      | AL022_RS01120                          | peptide ABC transporter ATP-binding protein       | 245.38                          | 470.75                            | 1.918        | 0.016        | 0.269        |
| <b>CAHE_0131</b>                               | <b>AL022_RS00605</b>                   | <b>30S ribosomal protein S5</b>                   | <b>353.56</b>                   | <b>673.17</b>                     | <b>1.904</b> | <b>0.000</b> | <b>0.022</b> |
| CAHE_0133                                      | AL022_RS00615                          | 50S ribosomal protein L6                          | 199.95                          | 377.85                            | 1.89         | 0.003        | 0.114        |
| <b>CAHE_0339</b>                               | <b>AL022_RS01565</b>                   | <b>DNA-directed RNA polymerase subunit beta</b>   | <b>1783.38</b>                  | <b>3335.95</b>                    | <b>1.871</b> | <b>0.000</b> | <b>0.009</b> |
| <b>CAHE_0565</b>                               | <b>AL022_RS02585</b>                   | <b>transcription elongation factor GreA</b>       | <b>141.55</b>                   | <b>264.19</b>                     | <b>1.866</b> | <b>0.001</b> | <b>0.052</b> |
| CAHE_0706                                      | AL022_RS03235                          | hypothetical protein                              | 655.26                          | 1217.74                           | 1.858        | 0.341        | 0.721        |
| <b>CAHE_0130</b>                               | <b>AL022_RS00600</b>                   | <b>50S ribosomal protein L30</b>                  | <b>147.84</b>                   | <b>274.74</b>                     | <b>1.858</b> | <b>0.000</b> | <b>0.052</b> |
| CAHE_0428                                      | AL022_RS01970                          | 3-oxoacyl-ACP synthase                            | 581.62                          | 1073.42                           | 1.846        | 0.007        | 0.191        |
| CAHE_0240                                      | AL022_RS01115                          | peptide ABC transporter substrate-binding protein | 207.59                          | 378.84                            | 1.825        | 0.010        | 0.224        |
| -                                              | <b>AL022_RS01110</b>                   | <b>hypothetical protein</b>                       | <b>214.87</b>                   | <b>390.65</b>                     | <b>1.818</b> | <b>0.000</b> | <b>0.04</b>  |
| <b>CAHE_0242</b>                               | <b>AL022_RS01125</b>                   | <b>peptide ABC transporter permease</b>           | <b>212.17</b>                   | <b>384.43</b>                     | <b>1.812</b> | <b>0.000</b> | <b>0.04</b>  |

|                  |                      |                                                |                |                |              |              |              |
|------------------|----------------------|------------------------------------------------|----------------|----------------|--------------|--------------|--------------|
| <b>CAHE_0475</b> | <b>AL022_RS02215</b> | <b>30S ribosomal protein S9</b>                | <b>213.37</b>  | <b>385.64</b>  | <b>1.807</b> | <b>0.001</b> | <b>0.052</b> |
| <b>CAHE_0338</b> | <b>AL022_RS01560</b> | <b>rpoB</b>                                    | <b>2191.78</b> | <b>3822.27</b> | <b>1.744</b> | <b>0.000</b> | <b>0.035</b> |
| <b>CAHE_0132</b> | <b>AL022_RS00610</b> | <b>50S ribosomal protein L18</b>               | <b>111.66</b>  | <b>192.77</b>  | <b>1.726</b> | <b>0.001</b> | <b>0.079</b> |
| CAHE_0411        | AL022_RS01890        | CMP deaminase                                  | 18.71          | 32.24          | 1.723        | 0.204        | 0.546        |
| <b>CAHE_0678</b> | <b>AL022_RS03105</b> | <b>hypothetical protein</b>                    | <b>155.67</b>  | <b>268.09</b>  | <b>1.722</b> | <b>0.001</b> | <b>0.079</b> |
| CAHE_0794        | AL022_RS03690        | pseudouridine synthase                         | 114.04         | 191.85         | 1.682        | 0.056        | 0.338        |
| <b>CAHE_0102</b> | <b>AL022_RS00470</b> | <b>hypothetical protein</b>                    | <b>446.65</b>  | <b>750.46</b>  | <b>1.68</b>  | <b>0.001</b> | <b>0.052</b> |
| <b>CAHE_0335</b> | <b>AL022_RS01545</b> | <b>50S ribosomal protein L1</b>                | <b>701.12</b>  | <b>1160.67</b> | <b>1.655</b> | <b>0.001</b> | <b>0.057</b> |
| CAHE_0278        | AL022_RS01260        | hypothetical protein                           | 96.04          | 158.32         | 1.648        | 0.205        | 0.546        |
| -                | AL022_RS04090        | transposase                                    | 1255.14        | 2053.5         | 1.636        | 0.438        | 0.764        |
| CAHE_0376        | AL022_RS01730        | pyridoxal biosynthesis protein                 | 350.33         | 567.97         | 1.621        | 0.021        | 0.282        |
| CAHE_0430        | AL022_RS01980        | cysteine desulfurase activator complex subunit | 216.22         | 350.1          | 1.619        | 0.027        | 0.282        |
| CAHE_0753        | AL022_RS03460        | peptide chain release factor 1                 | 482.62         | 780.34         | 1.617        | 0.011        | 0.226        |
| CAHE_0765        | AL022_RS03525        | acetyl-CoA synthetase                          | 292.87         | 473.06         | 1.615        | 0.209        | 0.549        |
| CAHE_0129        | AL022_RS00595        | 50S ribosomal protein L15                      | 270.99         | 437.06         | 1.613        | 0.005        | 0.168        |

<sup>1</sup> Penz T, Schmitz-Esser S, Kelly SE, Cass BN, Muller A, Woyke T, Malfatti SA, Hunter MS, Horn M. 2012. Comparative genomics suggests an independent origin of cytoplasmic incompatibility in *Cardinium hertigii*. PLoS Genet 8(10): e1003012. Genbank accession numbers: HE983995 and HE983996

<sup>2</sup> Genbank accession numbers: NC\_018605.1 and NC\_018606.1
