# Supplementary material for: Transcriptome Sequencing Reveals Novel Candidate Genes for Cardinium hertigii-Caused Cytoplasmic Incompatibility and Host-Cell Interaction
Source: PubMed Central journal article supplement (PMC5698495; doi:10.1128/msystems.00141-17), 2017-11-21
Supplement: sys006172150st5.pdf [file sys006172150st5.pdf]

**Table S5. Gene expression of transposases in the *Cardinium hertigii* cEper1 genome.**

| Locus tags from Penz et al., 2012 <sup>1</sup> | Current GenBank locus tag <sup>2</sup> | Best blast hit (GenBank accession no.)                                                                           | Amino acid identities to best blast hit (%) | Mean normalized counts of cEper1 expression |                                |                                |                                  |                                  |                                  |
|------------------------------------------------|----------------------------------------|------------------------------------------------------------------------------------------------------------------|---------------------------------------------|---------------------------------------------|--------------------------------|--------------------------------|----------------------------------|----------------------------------|----------------------------------|
|                                                |                                        |                                                                                                                  |                                             | 1 <sup>st</sup> male replicate              | 2 <sup>nd</sup> male replicate | 3 <sup>rd</sup> male replicate | 1 <sup>st</sup> female replicate | 2 <sup>nd</sup> female replicate | 3 <sup>rd</sup> female replicate |
| CAHE_0001                                      | AL022_RS00010                          | IS6 family transposase [ <i>Cardinium</i> endosymbiont of <i>Bemisia tabaci</i> ] (WP_034576929.1)               | 89                                          | 162.07                                      | 136.56                         | 180.53                         | 133.62                           | 123.89                           | 76.25                            |
| CAHE_0031                                      | AL022_RS00155                          | IS6 family transposase [ <i>Cardinium</i> endosymbiont cBtQ1 of <i>Bemisia tabaci</i> ] (CDG50390.1)             | 88                                          | 298.33                                      | 287.31                         | 287.29                         | 276.91                           | 255.99                           | 208.35                           |
| CAHE_0041                                      | AL022_RS00195                          | Transposase [ <i>Cardinium</i> endosymbiont of <i>Ixodes scapularis</i> ] (ACZ36949.1)                           | 87                                          | 590.93                                      | 564.86                         | 582.35                         | 503.48                           | 507.49                           | 428.51                           |
| CAHE_0085                                      | AL022_RS00395                          | Transposase [ <i>Cardinium</i> endosymbiont of <i>Ixodes scapularis</i> ] (ACZ36949.1)                           | 87                                          | 609.57                                      | 542.70                         | 614.38                         | 515.10                           | 466.45                           | 399.51                           |
| CAHE_0086                                      | AL022_RS00400                          | IS256 family transposase [ <i>Cardinium</i> endosymbiont of <i>Bemisia tabaci</i> ] (WP_051602130.1)             | 92                                          | 134.82                                      | 106.41                         | 99.00                          | 99.73                            | 77.62                            | 82.69                            |
| CAHE_0089                                      | AL022_RS00415                          | IS3 family transposase, ssgr IS150 [ <i>Cardinium</i> endosymbiont cBtQ1 of <i>Bemisia tabaci</i> ] (CDG49338.1) | 89                                          | 681.29                                      | 575.51                         | 644.47                         | 505.42                           | 556.00                           | 209.42                           |
| CAHE_0090                                      | AL022_RS00420                          | IS6 family transposase [ <i>Cardinium</i> endosymbiont cBtQ1 of <i>Bemisia tabaci</i> ] (CDG50390.1)             | 96                                          | 67.41                                       | 70.94                          | 103.85                         | 61.97                            | 61.20                            | 37.59                            |
| CAHE_0179                                      | AL022_RS00820                          | ISNCY family transposase [ <i>Cardinium</i> endosymbiont cBtQ1 of <i>Bemisia tabaci</i> ] (CDG50399.1)           | 81                                          | 269.65                                      | 354.70                         | 395.03                         | 303.06                           | 372.41                           | 331.85                           |
| CAHE_0284                                      | AL022_RS01290                          | IS6 family transposase [ <i>Cardinium</i> endosymbiont cBtQ1 of <i>Bemisia tabaci</i> ] (CDG50390.1)             | 88                                          | 73.15                                       | 78.03                          | 75.71                          | 65.84                            | 37.32                            | 40.81                            |
| CAHE_0285                                      | AL022_RS01295                          | IS6 family transposase [ <i>Cardinium</i> endosymbiont cBtQ1 of <i>Bemisia tabaci</i> ] (CDG50390.1)             | 86                                          | 499.13                                      | 593.24                         | 710.47                         | 513.16                           | 535.85                           | 292.12                           |
| CAHE_0370                                      | AL022_RS01695                          | IS3 family transposase, ssgr IS150 [ <i>Cardinium</i> endosymbiont cBtQ1 of <i>Bemisia tabaci</i> ] (CDG49338.1) | 90                                          | 687.02                                      | 651.77                         | 644.47                         | 559.64                           | 583.62                           | 264.19                           |
| CAHE_0447                                      | AL022_RS02080                          | IS5 family transposase [ <i>Cardinium</i> endosymbiont of <i>Bemisia tabaci</i> ] (WP_034576548.1)               | 90                                          | 71.71                                       | 63.85                          | 79.59                          | 60.03                            | 60.45                            | 45.11                            |

|           |               |                                                                                                                  |    |         |         |         |         |         |        |
|-----------|---------------|------------------------------------------------------------------------------------------------------------------|----|---------|---------|---------|---------|---------|--------|
| CAHE_0471 | AL022_RS02195 | Hypothetical protein [ <i>Cardinium</i> endosymbiont of <i>Bemisia tabaci</i> ] (WP_034577391.1)                 | 88 | 281.12  | 283.76  | 311.56  | 224.63  | 221.66  | 121.36 |
| CAHE_0500 | AL022_RS02325 | Transposase [ <i>Cardinium</i> endosymbiont of <i>Ixodes scapularis</i> ] (ACZ36949.1)                           | 83 | 1041.29 | 924.89  | 920.12  | 759.09  | 753.78  | 651.89 |
| CAHE_0515 | AL022_RS02385 | Transposase [ <i>Cardinium</i> endosymbiont of <i>Bemisia tabaci</i> ] (WP_034577235.1)                          | 89 | 38.73   | 26.60   | 28.15   | 28.08   | 35.08   | 33.29  |
| CAHE_0516 | AL022_RS02390 | IS5 family transposase [ <i>Cardinium</i> endosymbiont of <i>Bemisia tabaci</i> ] (WP_051602192.1)               | 88 | 43.03   | 54.09   | 71.82   | 56.16   | 48.51   | 59.07  |
| CAHE_0517 | AL022_RS02395 | IS5 family transposase [ <i>Cardinium</i> endosymbiont of <i>Bemisia tabaci</i> ] (WP_051602251.1)               | 91 | 177.85  | 173.80  | 193.15  | 161.69  | 147.02  | 147.13 |
| CAHE_0539 | AL022_RS02470 | Hypothetical protein [ <i>Cardinium</i> endosymbiont of <i>Bemisia tabaci</i> ] (WP_051602225.1)                 | 89 | 4.30    | 10.64   | 14.56   | 3.87    | 6.72    | 4.30   |
| CAHE_0540 | AL022_RS02475 | Transposase [ <i>Cardinium</i> endosymbiont of <i>Bemisia tabaci</i> ] (WP_034576632.1)                          | 56 | 347.10  | 403.47  | 431.91  | 417.31  | 330.62  | 224.46 |
| CAHE_0541 | AL022_RS02480 | IS3 family transposase, ssgr IS150 [ <i>Cardinium</i> endosymbiont cBtQ1 of <i>Bemisia tabaci</i> ] (CDG49338.1) | 90 | 758.74  | 693.44  | 753.18  | 614.83  | 645.56  | 292.12 |
| CAHE_0542 | AL022_RS02485 | Hypothetical protein [ <i>Candidatus</i> Amoebophilus asiaticus] (WP_012473024.1)                                | 42 | 456.10  | 451.36  | 489.18  | 323.39  | 380.62  | 90.21  |
| CAHE_0547 | AL022_RS02505 | IS3 family transposase, ssgr IS150 [ <i>Cardinium</i> endosymbiont cBtQ1 of <i>Bemisia tabaci</i> ] (CDG49338.1) | 90 | 777.38  | 707.63  | 689.12  | 597.40  | 553.02  | 254.53 |
| CAHE_0551 | AL022_RS02520 | Transposase [ <i>Rickettsia parkeri</i> str. Portsmouth] (AFC74898.1)                                            | 75 | 917.94  | 978.09  | 978.35  | 963.39  | 905.28  | 976.23 |
| CAHE_0553 | AL022_RS02530 | Hypothetical protein [ <i>Cardinium</i> endosymbiont of <i>Bemisia tabaci</i> ] (WP_034576733.1)                 | 83 | 484.79  | 521.41  | 552.26  | 420.21  | 404.50  | 205.13 |
| CAHE_0554 | AL022_RS02535 | Tyrosine recombinase XerD [ <i>Legionella nautarum</i> ] (KTD32257.1)                                            | 87 | 67.41   | 59.41   | 59.21   | 66.81   | 63.44   | 53.70  |
| CAHE_0594 | AL022_RS02710 | Hypothetical protein [ <i>Cardinium</i> endosymbiont of <i>Bemisia tabaci</i> ] (WP_034576733.1)                 | 81 | 1580.59 | 1566.01 | 1713.09 | 1463.00 | 1215.00 | 750.70 |
| CAHE_0601 | AL022_RS02735 | IS5 family transposase [ <i>Cardinium</i> endosymbiont of <i>Bemisia tabaci</i> ] (WP_051602192.1)               | 95 | 48.77   | 76.26   | 66.97   | 70.68   | 67.17   | 60.14  |
| CAHE_0602 | AL022_RS02740 | IS5 family transposase [ <i>Cardinium</i> endosymbiont of <i>Bemisia tabaci</i> ] (WP_034576548.1)               | 90 | 73.15   | 45.22   | 55.32   | 69.71   | 53.73   | 61.22  |
| CAHE_0609 | AL022_RS02775 | ISNCY family transposase [ <i>Cardinium</i> endosymbiont cBtQ1 of <i>Bemisia tabaci</i> ] (CDG50399.1)           | 87 | 34.42   | 39.90   | 56.29   | 31.95   | 37.32   | 17.18  |
| CAHE_0610 | AL022_RS02780 | IS5 family transposase [ <i>Cardinium</i> endosymbiont of <i>Bemisia tabaci</i> ] (WP_034576548.1)               | 90 | 84.62   | 66.51   | 91.24   | 67.78   | 58.21   | 60.14  |

|           |               |                                                                                                                  |    |         |         |         |         |         |         |
|-----------|---------------|------------------------------------------------------------------------------------------------------------------|----|---------|---------|---------|---------|---------|---------|
| CAHE_0611 | AL022_RS02785 | Hypothetical protein [ <i>Cardinium</i> endosymbiont of <i>Bemisia tabaci</i> ] (WP_034576570.1)                 | 90 | 60.24   | 72.71   | 65.03   | 78.43   | 67.91   | 75.18   |
| CAHE_0627 | AL022_RS02865 | IS6 family transposase [ <i>Cardinium</i> endosymbiont of <i>Bemisia tabaci</i> ] (WP_034576929.1)               | 89 | 187.89  | 190.65  | 255.26  | 185.90  | 194.04  | 104.17  |
| CAHE_0631 | AL022_RS02885 | Transposase [ <i>Cardinium</i> endosymbiont of <i>Ixodes scapularis</i> ] (ACZ36949.1)                           | 83 | 1061.37 | 992.28  | 858.97  | 766.84  | 731.39  | 623.97  |
| CAHE_0682 | AL022_RS03130 | Transposase [ <i>Candidatus</i> Amoebophilus asiaticus] (ADL32106.1)                                             | 78 | 68.85   | 58.53   | 82.50   | 49.38   | 46.27   | 39.74   |
| CAHE_0683 | AL022_RS03135 | Hypothetical protein [ <i>Acinetobacter</i> sp. CIP 102529] (WP_004763135.1)                                     | 65 | 51.63   | 33.70   | 32.03   | 28.08   | 34.33   | 42.96   |
| CAHE_0686 | AL022_RS03140 | IS3 family transposase, ssgr IS150 [ <i>Cardinium</i> endosymbiont cBtQ1 of <i>Bemisia tabaci</i> ] (CDG49338.1) | 90 | 695.63  | 612.75  | 658.06  | 543.18  | 515.70  | 220.16  |
| CAHE_0688 | AL022_RS03145 | ISNCY family transposase [ <i>Cardinium</i> endosymbiont cBtQ1 of <i>Bemisia tabaci</i> ] (CDG50399.1)           | 86 | 787.42  | 813.16  | 801.71  | 1309.05 | 540.33  | 652.97  |
| CAHE_0689 | AL022_RS03150 | Transposase [ <i>Cardinium</i> endosymbiont of <i>Bemisia tabaci</i> ] (WP_034577235.1)                          | 88 | 30.12   | 31.04   | 33.97   | 55.19   | 26.87   | 19.33   |
| CAHE_0708 | AL022_RS03240 | Transposase [ <i>Rickettsia felis</i> URRWXCa2] (AA Y60952.1)                                                    | 75 | 735.79  | 669.50  | 715.32  | 583.84  | 617.20  | 640.08  |
| CAHE_0738 | AL022_RS03385 | IS110 family transposase [ <i>Ornithobacterium rhinotracheale</i> ] (WP_014790141.1)                             | 51 | 1662.34 | 1499.51 | 1551.97 | 1185.11 | 1235.15 | 1229.68 |
| CAHE_0739 | AL022_RS03390 | IS256 family transposase [ <i>Cardinium</i> endosymbiont of <i>Bemisia tabaci</i> ] (WP_051602183.1)             | 88 | 309.81  | 253.61  | 264.00  | 314.67  | 235.84  | 241.64  |
| CAHE_0787 | AL022_RS03655 | IS6 family transposase [ <i>Cardinium</i> endosymbiont cBtQ1 of <i>Bemisia tabaci</i> ] (CDG50390.1)             | 88 | 246.70  | 228.78  | 264.97  | 201.39  | 147.02  | 108.47  |
| CAHE_0809 | AL022_RS03760 | Hypothetical protein [ <i>Cardinium</i> endosymbiont of <i>Bemisia tabaci</i> ] (WP_051602146.1)                 | 96 | 259.61  | 215.48  | 219.35  | 243.99  | 217.18  | 123.51  |
| CAHE_0810 | AL022_RS03765 | IS3 family transposase, ssgr IS150 [ <i>Cardinium</i> endosymbiont cBtQ1 of <i>Bemisia tabaci</i> ] (CDG49338.1) | 90 | 742.96  | 712.95  | 699.79  | 602.24  | 598.54  | 279.23  |
| CAHE_0811 | AL022_RS03770 | IS3 family transposase, ssgr IS150 [ <i>Cardinium</i> endosymbiont cBtQ1 of <i>Bemisia tabaci</i> ] (CDG50385.1) | 88 | 489.09  | 462.89  | 492.09  | 383.42  | 387.34  | 143.91  |
| CAHE_0816 | AL022_RS03795 | Transposase [ <i>Rickettsia parkeri</i> str. Portsmouth] (AFC74898.1)                                            | 74 | 598.10  | 578.17  | 608.56  | 529.62  | 660.49  | 561.68  |
| CAHE_0818 | AL022_RS03805 | Resolvase [ <i>Cardinium</i> endosymbiont cBtQ1 of <i>Bemisia tabaci</i> ] (CDG50400.1)                          | 85 | 500.57  | 485.94  | 499.85  | 397.94  | 323.15  | 253.45  |
| CAHE_0823 | AL022_RS03825 | IS110 family transposase [ <i>Ornithobacterium rhinotracheale</i> ] (WP_014790141.1)                             | 51 | 1626.48 | 1570.45 | 1526.73 | 1230.62 | 1263.51 | 1101.88 |
| CAHE_0824 | AL022_RS03830 | Resolvase [ <i>Enterobacter cloacae</i> complex sp. GN02141] (WP_047721425.1)                                    | 77 | 238.09  | 231.44  | 231.97  | 174.28  | 165.68  | 138.54  |

|            |               |                                                                                                                  |    |         |         |         |         |         |         |
|------------|---------------|------------------------------------------------------------------------------------------------------------------|----|---------|---------|---------|---------|---------|---------|
| CAHE_0826  | AL022_RS03835 | DDE transposase [ <i>Salmonella enterica</i> ] (WP_001525361.1)                                                  | 77 | 76.02   | 46.11   | 54.35   | 45.51   | 28.36   | 50.48   |
| CAHE_0827  | AL022_RS03840 | IS110 family transposase [ <i>Ornithobacterium rhinotracheale</i> ] (WP_014790141.1)                             | 51 | 1659.47 | 1536.75 | 1551.97 | 1204.48 | 1289.63 | 1169.54 |
| CAHE_0828  | AL022_RS03845 | Integrase [ <i>Legionella pneumophila</i> ] (WP_061504282.1)                                                     | 78 | 45.90   | 24.83   | 42.71   | 18.40   | 20.90   | 34.37   |
| CAHE_0830  | AL022_RS03850 | Hypothetical protein [ <i>Cardinium</i> endosymbiont of <i>Bemisia tabaci</i> ] (WP_034576733.1)                 | 81 | 1207.67 | 1239.69 | 1327.76 | 1058.28 | 1024.69 | 592.82  |
| CAHE_0831  | AL022_RS03855 | IS6 family transposase [ <i>Cardinium</i> endosymbiont of <i>Bemisia tabaci</i> ] (WP_034576929.1)               | 89 | 504.87  | 555.11  | 560.03  | 425.05  | 388.83  | 262.05  |
| CAHE_0833  | AL022_RS03865 | IS3 family transposase, ssgr IS150 [ <i>Cardinium</i> endosymbiont cBtQ1 of <i>Bemisia tabaci</i> ] (CDG50385.1) | 88 | 691.33  | 670.39  | 728.91  | 570.29  | 568.69  | 266.34  |
| CAHE_p0001 | AL022_RS03915 | IS110 family transposase [ <i>Ornithobacterium rhinotracheale</i> ] (WP_014790141.1)                             | 51 | 1917.64 | 1740.71 | 1721.82 | 1337.13 | 1385.91 | 1341.37 |
| CAHE_p0002 | AL022_RS03920 | ISNCY family transposase [ <i>Cardinium</i> endosymbiont cBtQ1 of <i>Bemisia tabaci</i> ] (CDG50399.1)           | 76 | 463.28  | 504.57  | 549.35  | 502.51  | 305.24  | 329.71  |
| CAHE_p0003 | AL022_RS03925 | Transposase [ <i>Cardinium</i> endosymbiont of <i>Ixodes scapularis</i> ] (ACZ36949.1)                           | 78 | 1904.74 | 1672.43 | 1577.21 | 1435.89 | 1332.92 | 1336.00 |
| CAHE_p0004 | AL022_RS03930 | Integrase [ <i>Legionella pneumophila</i> ] (WP_042238319.1)                                                     | 79 | 193.63  | 174.69  | 192.18  | 167.50  | 151.50  | 165.39  |
| CAHE_p0005 | AL022_RS03935 | Hypothetical protein [ <i>Cardinium</i> endosymbiont of <i>Bemisia tabaci</i> ] (WP_034577172.1)                 | 79 | 1150.30 | 1226.39 | 1406.38 | 1240.30 | 915.73  | 719.55  |
| CAHE_p0006 | AL022_RS03940 | IS6 family transposase [ <i>Cardinium</i> endosymbiont of <i>Bemisia tabaci</i> ] (WP_014934436.1)               | 90 | 1364.01 | 1374.48 | 1573.32 | 1213.19 | 1155.30 | 768.95  |
| CAHE_p0012 | AL022_RS03960 | Resolvase [ <i>Enterobacter cloacae</i> complex sp. GN02141] (WP_047721425.1)                                    | 77 | 238.09  | 231.44  | 231.97  | 174.28  | 165.68  | 138.54  |
| CAHE_p0013 | AL022_RS03965 | Hypothetical protein [ <i>Photorhabdus temperata</i> ] (WP_021325327.1)                                          | 36 | 1120.18 | 1150.13 | 1324.85 | 1664.39 | 825.42  | 712.03  |
| CAHE_p0032 | AL022_RS04050 | Hypothetical protein CHV_p007 [ <i>Cardinium</i> endosymbiont cBtQ1 of <i>Bemisia tabaci</i> ] (CDG50372.1)      | 77 | 78.89   | 2.66    | 1.94    | 67.78   | 2.24    | 9.67    |
| CAHE_p0039 | AL022_RS04080 | Hypothetical protein [ <i>Cardinium</i> endosymbiont of <i>Bemisia tabaci</i> ] (WP_034577391.1)                 | 80 | 958.11  | 201.29  | 237.79  | 1058.28 | 165.68  | 563.83  |
| CAHE_p0040 | AL022_RS04085 | IS256 family transposase [ <i>Cardinium</i> endosymbiont of <i>Bemisia tabaci</i> ] (WP_051602183.1)             | 88 | 476.18  | 1028.64 | 1034.65 | 405.69  | 778.41  | 388.77  |
| CAHE_p0046 | AL022_RS04105 | IS6 family transposase [ <i>Cardinium</i> endosymbiont of <i>Bemisia tabaci</i> ] (WP_034576929.1)               | 87 | 1287.99 | 524.07  | 720.18  | 1195.76 | 641.83  | 745.33  |
| CAHE_p0047 | AL022_RS04110 | IS110 family transposase [ <i>Ornithobacterium rhinotracheale</i> ] (WP_014790141.1)                             | 51 | 1682.42 | 1324.82 | 1576.23 | 1255.79 | 1029.17 | 1188.87 |

|            |               |                                                                                                                  |    |         |         |         |         |         |         |
|------------|---------------|------------------------------------------------------------------------------------------------------------------|----|---------|---------|---------|---------|---------|---------|
| CAHE_p0062 | AL022_RS04165 | Hypothetical protein [ <i>Cardinium</i> endosymbiont of <i>Bemisia tabaci</i> ] (WP_034576556.1)                 | 84 | 1501.70 | 15.96   | 14.56   | 1344.87 | 8.96    | 581.01  |
| CAHE_p0063 | AL022_RS04170 | IS6 family transposase [ <i>Cardinium</i> endosymbiont cBtQ1 of <i>Bemisia tabaci</i> ] (CDG50390.1)             | 88 | 384.39  | 1456.94 | 1586.91 | 342.75  | 1154.55 | 155.72  |
| CAHE_p0064 | AL022_RS04175 | IS3 family transposase, ssgr IS150 [ <i>Cardinium</i> endosymbiont cBtQ1 of <i>Bemisia tabaci</i> ] (CDG50385.1) | 88 | 3336.16 | 342.29  | 386.29  | 2652.95 | 303.00  | 1115.84 |
| CAHE_p0065 | AL022_RS04180 | Transposase [ <i>Rickettsia parkeri</i> str. Portsmouth] (AFC74898.1)                                            | 80 | 1141.69 | 3035.37 | 3137.91 | 1117.34 | 2709.12 | 1007.37 |

<sup>1</sup> Penz T, Schmitz-Esser S, Kelly SE, Cass BN, Muller A, Woyke T, Malfatti SA, Hunter MS, Horn M. 2012. Comparative genomics suggests an independent origin of cytoplasmic incompatibility in *Cardinium hertigii*. PLoS Genet 8(10): e1003012. Genbank accession numbers: HE983995 and HE983996

<sup>2</sup> Genbank accession numbers: NC\_018605.1 and NC\_018606.1
