# Supplementary material for: Transcriptome Sequencing Reveals Novel Candidate Genes for Cardinium hertigii-Caused Cytoplasmic Incompatibility and Host-Cell Interaction
Source: PubMed Central journal article supplement (PMC5698495; doi:10.1128/msystems.00141-17), 2017-11-21
Supplement: sys006172150st6.pdf [file sys006172150st6.pdf]

**Table S6. Transcription of *Cardinium hertigii* cEper1 genes encoding proteins possibly involved in host cell interactions.**

| Locus tags from Penz et al., 2012 <sup>1</sup> | Current GenBank locus tag <sup>2</sup> | Best blast hit (GenBank accession no.)                                                                           | Amino acid identities to best blast hit in % | Mean normalized counts of cEper1 expression |                                |                                |                                  |                                  |                                  |
|------------------------------------------------|----------------------------------------|------------------------------------------------------------------------------------------------------------------|----------------------------------------------|---------------------------------------------|--------------------------------|--------------------------------|----------------------------------|----------------------------------|----------------------------------|
|                                                |                                        |                                                                                                                  |                                              | 1 <sup>st</sup> male replicate              | 2 <sup>nd</sup> male replicate | 3 <sup>rd</sup> male replicate | 1 <sup>st</sup> female replicate | 2 <sup>nd</sup> female replicate | 3 <sup>rd</sup> female replicate |
| <b>Ankyrin repeat proteins</b>                 |                                        |                                                                                                                  |                                              |                                             |                                |                                |                                  |                                  |                                  |
| CAHE_0040                                      | AL022_RS00190                          | Hypothetical protein [ <i>Cardinium</i> endosymbiont of <i>Bemisia tabaci</i> ] (WP_034576299.1)                 | 30                                           | 229.49                                      | 164.94                         | 175.68                         | 236.25                           | 201.51                           | 123.51                           |
| CAHE_0396                                      | AL022_RS01830                          | Hypothetical protein [ <i>Cardinium</i> endosymbiont of <i>Bemisia tabaci</i> ] (WP_051602196.1)                 | 41                                           | 301.20                                      | 284.65                         | 293.12                         | 229.47                           | 193.30                           | 221.24                           |
| CAHE_0435                                      | AL022_RS02005                          | Hypothetical protein [ <i>Cardinium</i> endosymbiont of <i>Bemisia tabaci</i> ] (WP_034576647.1)                 | 66                                           | 2071.11                                     | 1808.10                        | 1813.06                        | 1550.14                          | 1569.50                          | 1053.55                          |
| CAHE_0397                                      | AL022_RS01835                          | Hypothetical protein [ <i>Oidiodendron maius</i> Zn] (KIM99444.1)                                                | 58                                           | 163.51                                      | 167.60                         | 187.32                         | 143.30                           | 110.45                           | 115.99                           |
| CAHE_0491                                      | AL022_RS02295                          | Ankyrin repeats-containing protein [ <i>Cardinium</i> endosymbiont cBtQ1 of <i>Bemisia tabaci</i> ] (CDG49464.1) | 73                                           | 361.44                                      | 393.72                         | 394.06                         | 303.06                           | 261.96                           | 370.52                           |
| CAHE_0588                                      | AL022_RS02685                          | Hypothetical protein [ <i>Cardinium</i> endosymbiont of <i>Bemisia tabaci</i> ] (WP_034576449.1)                 | 86                                           | 153.47                                      | 172.03                         | 158.21                         | 169.44                           | 234.34                           | 219.09                           |
| CAHE_0670                                      | AL022_RS03065                          | Hypothetical protein [ <i>Cardinium</i> endosymbiont of <i>Bemisia tabaci</i> ] (WP_034576875.1)                 | 63                                           | 167.81                                      | 184.45                         | 167.91                         | 213.01                           | 238.07                           | 328.63                           |
| CAHE_0834                                      | AL022_RS03870                          | Hypothetical protein [ <i>Cardinium</i> endosymbiont of <i>Bemisia tabaci</i> ] (WP_034576747.1)                 | 80                                           | 1055.64                                     | 1011.79                        | 992.91                         | 823.96                           | 778.41                           | 962.27                           |
| CAHE_p0007                                     | AL022_RS03945                          | Hypothetical protein [ <i>Rickettsia bellii</i> ] (WP_011477011.1)                                               | 46                                           | 1808.64                                     | 1882.59                        | 2135.29                        | 1338.09                          | 1359.04                          | 1222.16                          |
| CAHE_p0014                                     | AL022_RS03970                          | Ankyrin repeat protein [ <i>Trichomonas vaginalis</i> G3] (XP_001316939.1)                                       | 41                                           | 1691.03                                     | 1806.33                        | 1835.38                        | 1116.37                          | 1305.31                          | 982.67                           |
| CAHE_p0019                                     | AL022_RS03995                          | Hypothetical protein [ <i>Cardinium</i> endosymbiont of <i>Bemisia tabaci</i> ] (WP_051602196.1)                 | 43                                           | 130.52                                      | 161.39                         | 163.06                         | 112.31                           | 141.80                           | 75.18                            |
| CAHE_0680                                      | AL022_RS03115                          | Hypothetical protein [ <i>Cardinium</i> endosymbiont of <i>Bemisia tabaci</i> ] (WP_034576855.1)                 | 88                                           | 948.07                                      | 828.23                         | 677.47                         | 1098.94                          | 1407.55                          | 2505.54                          |
| CAHE_p0026                                     | AL022_RS04030                          | Hypothetical protein [ <i>Cardinium</i> endosymbiont of <i>Bemisia tabaci</i> ] (WP_034577639.1)                 | 48                                           | 1257.87                                     | 1475.57                        | 1740.26                        | 1005.02                          | 920.95                           | 523.02                           |
| CAHE_0095                                      | AL022_RS00440                          | Ankyrin repeats-containing protein [ <i>Cardinium</i> endosymbiont cBtQ1 of <i>Bemisia tabaci</i> ] (CDG49910.1) | 93                                           | 1041.29                                     | 819.36                         | 969.62                         | 767.81                           | 714.22                           | 855.94                           |

**TPR repeat proteins**

|           |               |                                                                                                  |    |        |        |        |        |        |        |
|-----------|---------------|--------------------------------------------------------------------------------------------------|----|--------|--------|--------|--------|--------|--------|
| CAHE_0312 | AL022_RS01410 | Hypothetical protein [ <i>Cardinium</i> endosymbiont of <i>Bemisia tabaci</i> ] (WP_034577424.1) | 88 | 566.54 | 462.00 | 515.38 | 454.10 | 421.67 | 465.02 |
| CAHE_0450 | AL022_RS02095 | Hypothetical protein [ <i>Cardinium</i> endosymbiont of <i>Bemisia tabaci</i> ] (WP_034577415.1) | 80 | 302.63 | 298.84 | 351.35 | 285.63 | 238.07 | 224.46 |
| CAHE_0452 | AL022_RS02105 | Hypothetical protein [ <i>Cardinium</i> endosymbiont of <i>Bemisia tabaci</i> ] (WP_051602092.1) | 83 | 226.62 | 219.92 | 201.88 | 188.80 | 231.36 | 158.95 |

**Ubiquitin protease**

|           |               |                                                                                                           |    |        |        |        |        |        |        |
|-----------|---------------|-----------------------------------------------------------------------------------------------------------|----|--------|--------|--------|--------|--------|--------|
| CAHE_0028 | AL022_RS00135 | Ubiquitin specific protease [ <i>Cardinium</i> endosymbiont cBtQ1 of <i>Bemisia tabaci</i> ] (CDG50083.1) | 46 | 621.05 | 654.43 | 636.71 | 756.19 | 792.59 | 895.68 |
|-----------|---------------|-----------------------------------------------------------------------------------------------------------|----|--------|--------|--------|--------|--------|--------|

**General host cell interaction genes**

|           |               |                                                                                                                |    |         |         |         |         |         |         |
|-----------|---------------|----------------------------------------------------------------------------------------------------------------|----|---------|---------|---------|---------|---------|---------|
| CAHE_0010 | AL022_RS00050 | Hypothetical protein [ <i>Cardinium</i> endosymbiont of <i>Bemisia tabaci</i> ] ( WP_034576461.1)              | 46 | 275.38  | 219.03  | 231.00  | 258.52  | 303.75  | 287.82  |
| CAHE_0286 | AL022_RS01300 | Patatin [ <i>Wolbachia</i> endosymbiont of <i>Culex quinquefasciatus</i> ] (WP_007302998.1)                    | 64 | 460.41  | 498.36  | 508.59  | 481.21  | 535.11  | 234.12  |
| CAHE_0706 | AL022_RS03235 | Hypothetical protein [ <i>Bacillus cereus</i> VD136] (EOP51398.1)                                              | 87 | 711.41  | 714.73  | 539.65  | 2247.26 | 435.10  | 970.86  |
| CAHE_0677 | AL022_RS03100 | DEAD/DEAH box helicase [ <i>Cardinium</i> endosymbiont of <i>Bemisia tabaci</i> ] (WP_034576864.1)             | 97 | 3985.89 | 4329.15 | 3868.76 | 4571.98 | 5379.44 | 7352.31 |
| CAHE_0017 | AL022_RS00085 | Hypothetical protein [ <i>Cardinium</i> endosymbiont of <i>Bemisia tabaci</i> ] (WP_034576476.1)               | 88 | 760.17  | 790.99  | 719.21  | 872.38  | 971.70  | 1141.62 |
| CAHE_0267 | AL022_RS01210 | DNA mismatch repair protein mutS [ <i>Cardinium</i> endosymbiont cBtQ1 of <i>Bemisia tabaci</i> ] (CDG49367.1) | 92 | 1147.43 | 1004.70 | 1088.03 | 963.39  | 1079.17 | 961.19  |
| CAHE_0050 | AL022_RS00235 | Hypothetical protein [ <i>Cardinium</i> endosymbiont of <i>Bemisia tabaci</i> ] (WP_034577189.1)               | 68 | 5738.59 | 6495.50 | 6406.85 | 6171.50 | 7742.27 | 6147.33 |

<sup>1</sup> Penz T, Schmitz-Esser S, Kelly SE, Cass BN, Muller A, Woyke T, Malfatti SA, Hunter MS, Horn M. 2012. Comparative genomics suggests an independent origin of cytoplasmic incompatibility in *Cardinium hertigii*. PLoS Genet 8(10): e1003012. Genbank accession numbers: HE983995 and HE983996

<sup>2</sup> Genbank accession numbers: NC\_018605.1 and NC\_018606.1
