# Supplementary material for: Transcriptome Sequencing Reveals Novel Candidate Genes for Cardinium hertigii-Caused Cytoplasmic Incompatibility and Host-Cell Interaction
Source: PubMed Central journal article supplement (PMC5698495; doi:10.1128/msystems.00141-17), 2017-11-21
Supplement: sys006172150st7.pdf [file sys006172150st7.pdf]

**Table S7. Transcription of *Cardinium hertigii* cEper1 genes encoding proteins of the putative antifeeding prophage-like secretion system.**

| Locus tags from Penz et al., 2012 <sup>1</sup> | Current GenBank locus tag <sup>2</sup> | Best blast hit (GenBank accession no.)                                                       | Amino acid identities to best blast hit in % | Mean normalized counts of cEper1 expression |                                |                                |                                  |                                  |                                  |
|------------------------------------------------|----------------------------------------|----------------------------------------------------------------------------------------------|----------------------------------------------|---------------------------------------------|--------------------------------|--------------------------------|----------------------------------|----------------------------------|----------------------------------|
|                                                |                                        |                                                                                              |                                              | 1 <sup>st</sup> male replicate              | 2 <sup>nd</sup> male replicate | 3 <sup>rd</sup> male replicate | 1 <sup>st</sup> female replicate | 2 <sup>nd</sup> female replicate | 3 <sup>rd</sup> female replicate |
| CAHE_0036                                      | AL022_RS00170                          | Adhesin <i>Cardinium</i> endosymbiont of <i>Bemisia tabaci</i> (WP_034576687.1)              | 97                                           | 684.16                                      | 574.62                         | 589.15                         | 624.51                           | 643.32                           | 545.57                           |
| CAHE_0037                                      | AL022_RS00175                          | Hypothetical protein <i>Cardinium</i> endosymbiont of <i>Bemisia tabaci</i> (WP_034576687.1) | 94                                           | 1580.59                                     | 1419.7                         | 1305.44                        | 1281.94                          | 1357.55                          | 1125.51                          |
| CAHE_0118                                      | AL022_RS00550                          | Hypothetical protein <i>Cardinium</i> endosymbiont of <i>Bemisia tabaci</i> (WP_034576687.1) | 83                                           | 625.35                                      | 554.22                         | 529.94                         | 455.07                           | 533.62                           | 639                              |
| CAHE_0409                                      | AL022_RS01880                          | Peptidase M41 <i>Cardinium</i> endosymbiont of <i>Bemisia tabaci</i> (WP_034576687.1)        | 94                                           | 560.81                                      | 486.83                         | 433.85                         | 634.19                           | 710.49                           | 898.9                            |
| CAHE_0456                                      | AL022_RS02120                          | Hypothetical protein <i>Cardinium</i> endosymbiont of <i>Bemisia tabaci</i> (WP_034576687.1) | 96                                           | 309.81                                      | 245.63                         | 242.65                         | 237.22                           | 257.48                           | 225.53                           |
| CAHE_0457                                      | AL022_RS02125                          | Hypothetical protein <i>Cardinium</i> endosymbiont of <i>Bemisia tabaci</i> (WP_034576687.1) | 87                                           | 448.93                                      | 392.83                         | 357.18                         | 405.69                           | 400.77                           | 424.21                           |
| CAHE_0458                                      | AL022_RS02130                          | Phage tail protein <i>Cardinium</i> endosymbiont of <i>Bemisia tabaci</i> (WP_034576687.1)   | 98                                           | 3402.13                                     | 2422.62                        | 2556.53                        | 3907.78                          | 3536.04                          | 2710.67                          |
| CAHE_0459                                      | AL022_RS02135                          | Hypothetical protein <i>Cardinium</i> endosymbiont of <i>Bemisia tabaci</i> (WP_034576687.1) | 95                                           | 648.3                                       | 381.31                         | 450.35                         | 660.33                           | 656.01                           | 326.48                           |
| CAHE_0460                                      | AL022_RS02140                          | Hypothetical protein <i>Cardinium</i> endosymbiont of <i>Bemisia tabaci</i> (WP_034576687.1) | 93                                           | 570.85                                      | 386.63                         | 391.15                         | 583.84                           | 582.87                           | 279.23                           |

|           |               |                                                                                                   |    |         |        |        |         |         |         |
|-----------|---------------|---------------------------------------------------------------------------------------------------|----|---------|--------|--------|---------|---------|---------|
| CAHE_0461 | AL022_RS02145 | Hypothetical protein <i>Cardinium</i> endosymbiont of <i>Bemisia tabaci</i> (WP_034576687.1)      | 93 | 502     | 312.14 | 313.5  | 516.07  | 479.88  | 265.27  |
| CAHE_0463 | AL022_RS02150 | Hypothetical protein <i>Cardinium</i> endosymbiont of <i>Bemisia tabaci</i> (WP_034576687.1)      | 84 | 1125.92 | 799.86 | 644.47 | 1209.32 | 1176.94 | 1008.45 |
| CAHE_0760 | AL022_RS03495 | Hypothetical protein <i>Cardinium</i> endosymbiont of <i>Bemisia tabaci</i> (WP_034576687.1)      | 91 | 787.42  | 582.6  | 628.94 | 679.7   | 699.3   | 591.75  |
| CAHE_0761 | AL022_RS03500 | Hypothetical protein <i>Cardinium</i> endosymbiont of <i>Bemisia tabaci</i> (WP_034576687.1)      | 93 | 137.69  | 149.86 | 162.09 | 165.57  | 138.81  | 149.28  |
| CAHE_0762 | AL022_RS03505 | Type VI secretion protein <i>Cardinium</i> endosymbiont of <i>Bemisia tabaci</i> (WP_034576687.1) | 95 | 192.19  | 203.95 | 193.15 | 204.3   | 147.02  | 313.6   |
| CAHE_0763 | AL022_RS03510 | Hypothetical protein <i>Cardinium</i> endosymbiont of <i>Bemisia tabaci</i> (WP_034576687.1)      | 96 | 530.69  | 497.47 | 438.71 | 415.37  | 409.73  | 567.05  |

<sup>1</sup> Penz T, Schmitz-Esser S, Kelly SE, Cass BN, Muller A, Woyke T, Malfatti SA, Hunter MS, Horn M. 2012. Comparative genomics suggests an independent origin of cytoplasmic incompatibility in *Cardinium hertigii*. PLoS Genet 8(10): e1003012. Genbank accession numbers: HE983995 and HE983996

<sup>2</sup> Genbank accession numbers: NC\_018605.1 and NC\_018606.1
