# Supplementary material for: Transcriptome Sequencing Reveals Novel Candidate Genes for Cardinium hertigii-Caused Cytoplasmic Incompatibility and Host-Cell Interaction
Source: PubMed Central journal article supplement (PMC5698495; doi:10.1128/msystems.00141-17), 2017-11-21
Supplement: sys006172150st8.pdf [file sys006172150st8.pdf]

**Table S8. Primer sequences, amplicon length and annealing temperature of primers targeting *cEper1* DE genes and two housekeeping genes (*gyrB* and *groEL*).** Annealing temperatures were optimized with genomic DNA isolated from a culture of *E. suzannae* infected with *Cardinium hertigii cEper1*.

| <i>Cardinium</i> locus tag <sup>1</sup> | Forward primer sequence (5' - 3') | Reverse primer sequence (5' - 3') | Expected length of amplicate [bp] | Annealing temperature [°C] |
|-----------------------------------------|-----------------------------------|-----------------------------------|-----------------------------------|----------------------------|
| AL022_RS02415- <i>GyrB</i>              | ACGAGACCCTACGCTTTGTG              | GCTACACCCAGTGCAGTGAT              | 195                               | 57                         |
| AL022_RS01165- <i>GroEL</i>             | TTTGAGGCATAGGAGCAGGC              | CCATTGTAGCCAATGCAGGC              | 249                               | 57                         |
| CAHE_0339                               | CATAGAGCGTGGGGTAGCAG              | AACGGCCATTTGATCCCCAT              | 250                               | 57                         |
| CAHE_0131                               | TGCGGATTAGAAGAACCCTGG             | GTAGAGGCAGCTAAGCGCAA              | 191                               | 58                         |
| CAHE_0338                               | GCTAAGGTAGTGCCTGCCAA              | TCCAATCCTGGACCACTTGC              | 197                               | 57                         |
| AL022_RS01110                           | TCCGTTCTAGCCCCATACCA              | TTGACCCAAATGATGGCCGA              | 213                               | 57                         |
| CAHE_0242                               | GGCTATGTGCTCGTAGCAGT              | AACCGTCATGGCTACTTCGG              | 174                               | 57                         |
| CAHE_0130                               | TGGAACAAATTAGAATTACACAGGT         | TGACTTTACGTACCATACCCCA            | 150                               | 55                         |
| CAHE_0475                               | CCGCCGTAGCTAGGGTGTAT              | ATACCCAAGCGAATGGCTTCA             | 188                               | 58                         |
| CAHE_0565                               | GCCAATGACTTGGCAGAAGC              | CAGCTTCACCCTGAGAGACA              | 250                               | 57                         |
| CAHE_0102                               | TCTCATCTGCCATTGTGGCT              | CAATAGCCCACCCCAAAGGT              | 225                               | 57                         |
| CAHE_p0027                              | GGAAACTCGTTTACATCTCACACA          | CACGCCCTGCTCCATTATCT              | 182                               | 57                         |
| CAHE_0335                               | CGGTTTCAGCTCGTGCAAAAA             | CAGCTTGCCTAGCCTCTTGT              | 195                               | 57                         |
| CAHE_p0026                              | GGGCTGCTAGAGGTGGTTTT              | TGAGCATCATCTGGGGAAAGG             | 157                               | 59                         |
| CAHE_0132                               | CCGCGTCTTTCGCTTTTCAA              | TTTAGCCAACGCTTGTGCG               | 171                               | 57                         |
| CAHE_0678                               | GCACAGCTATGCAGGAAGGA              | CCCAATACCGAATACGCCCA              | 151                               | 57                         |
| CAHE_0544                               | GCTGCATAACTGATCCAAAGGG            | AGCATCTTCTAAGTCCCAATCAGA          | 233                               | 57                         |

<sup>1</sup> Locus tags from Penz T, Schmitz-Esser S, Kelly SE, Cass BN, Muller A, Woyke T, Malfatti SA, Hunter MS, Horn M. 2012. Comparative genomics suggests an independent origin of cytoplasmic incompatibility in *Cardinium hertigii*. *PLoS Genet* 8(10): e1003012. (Genbank accession numbers: HE983995 and HE983996) and current GenBank locus tags (NC\_018605.1 and NC\_018606.1).
