# Supplementary material for: Transcriptome Sequencing Reveals Novel Candidate Genes for Cardinium hertigii-Caused Cytoplasmic Incompatibility and Host-Cell Interaction
Source: PubMed Central journal article supplement (PMC5698495; doi:10.1128/msystems.00141-17), 2017-11-21
Supplement: sys006172150st9.pdf [file sys006172150st9.pdf]

**Table S9. MIQE guidelines for RT q-PCR assays**

| Item                                                 | Importance | Status | Remarks                                                                                                                         |
|------------------------------------------------------|------------|--------|---------------------------------------------------------------------------------------------------------------------------------|
| <b>Experimental design</b>                           |            |        |                                                                                                                                 |
| definition of experimental and control groups        | E          | OK     | Male and female replicates                                                                                                      |
| number within each group                             | E          | OK     | three biological replicates per sample                                                                                          |
| Assay carried out by core lab or investigator's lab? | D          | OK     | Investigator's lab                                                                                                              |
| acknowledgement of authors' contributions            | D          | OK     | done                                                                                                                            |
| <b>Sample</b>                                        |            |        |                                                                                                                                 |
| description                                          | E          | OK     | RNA isolated from wasp pools                                                                                                    |
| volume/mass of sample processed                      | D          | OK     | Between 350 and 500 wasps which were one to three days old were collected from each cage                                        |
| microdissection or macrodissection                   | E          | OK     | macrodissection                                                                                                                 |
| processing procedure                                 | E          | OK     | Trizol protocol                                                                                                                 |
| If frozen - how and how quickly?                     | E          | OK     | shock frozen at -80°C for two minutes                                                                                           |
| If fixed - with what, how quickly?                   | E          | OK     | samples were not fixed, TRIzol reagent added immediately after harvesting                                                       |
| sample storage conditions and duration               | E          | OK     | from harvest until addition of TRIzol approximately 5min                                                                        |
| <b>Nucleic acid extraction</b>                       |            |        |                                                                                                                                 |
| procedure and/or instrumentation                     | E          | OK     | TRIzol-based total RNA extraction, mechanical lysis                                                                             |
| name of kit and details of any modifications         | E          | OK     | TRIzol reagent (Life Technologies)                                                                                              |
| source of additional reagents used                   | D          | OK     | -                                                                                                                               |
| details of DNase or RNase treatment                  | E          | OK     | TURBO DNA-free™ kit (Life Technologies)                                                                                         |
| contamination assessment (DNA or RNA)                | E          | OK     | PCR and agarose gelelectrophoresis; -RT controls (reverse transcription reaction without addition of enzyme) analysed with qPCR |
| nucleic acid quantification                          | E          | OK     | done                                                                                                                            |
| instrument and method                                | E          | OK     | Agilent 2100 bioanalyzer (Agilent Technologies, Palo Alto, CA)                                                                  |
| RNA integrity method/instrument                      | E          |        | Agilent 2100 bioanalyzer (Agilent Technologies, Palo Alto, CA)                                                                  |
| RIN/RQI or Cq of 3' and 5' transcripts               | E          |        | >4                                                                                                                              |
| electrophoresis traces                               | D          |        |                                                                                                                                 |
| inhibition testing (Cq dilutions, spike or other)    | E          |        | no inhibition                                                                                                                   |
| <b>Reverse transcription</b>                         |            |        |                                                                                                                                 |
| Reaction conditions                                  | E          | OK     |                                                                                                                                 |
| Amount of RNA and reaction volume                    | E          | OK     | 15µl                                                                                                                            |
| Priming oligonucleotide and concentration            | E          | OK     | random hexamer primers (final concentration 8 ng µl <sup>-1</sup> )                                                             |
| Reverse transcriptase and concentration              | E          | OK     | RevertAid H Minus First Strand cDNA Synthesis Kit, Thermo Scientific, Vienna, Austria                                           |
| Temperature and time                                 | E          | OK     | RNA secondary structures were broken up at 65°C for 5 min, cDNA synthesis was done at 45°C for 60                               |

|                                                           |   |    |                                                                                                                                                                                                                                                                                                                                                                                                                                                                     |
|-----------------------------------------------------------|---|----|---------------------------------------------------------------------------------------------------------------------------------------------------------------------------------------------------------------------------------------------------------------------------------------------------------------------------------------------------------------------------------------------------------------------------------------------------------------------|
|                                                           |   |    | min after a pre-incubation at 25°C for 5 min. The reaction was terminated by heating at 70°C for 5 min and cDNA was stored at -20°C.                                                                                                                                                                                                                                                                                                                                |
| Manufacturer of reagents and catalogue numbers            | D | OK | Invitrogen                                                                                                                                                                                                                                                                                                                                                                                                                                                          |
| Cqs with and without RT                                   | D | OK | below limit of detection                                                                                                                                                                                                                                                                                                                                                                                                                                            |
| Storage conditions of cDNA                                | D | OK | -20°C for 2 weeks                                                                                                                                                                                                                                                                                                                                                                                                                                                   |
| <b>qPCR target information</b>                            |   | OK |                                                                                                                                                                                                                                                                                                                                                                                                                                                                     |
| if multiplex, efficiency and LOD of each assay.           | E | OK | no multiplexing                                                                                                                                                                                                                                                                                                                                                                                                                                                     |
| sequence accession number                                 | E |    | CAHE_0131 Gene ID: 13654403<br>CAHE_0339 Gene ID: 13654411<br>CAHE_0565 Gene ID: 13654933<br>CAHE_0130 Gene ID: 13654389<br>AL022_RS01110 -<br>CAHE_0242 Gene ID: 13654084<br>CAHE_0475 Gene ID: 13654387<br>CAHE_0338 Gene ID: 13654386<br>CAHE_0132 Gene ID: 13654418<br>CAHE_0678 Gene ID: 13654064<br>CAHE_0102 Gene ID: 13654522<br>CAHE_0335 Gene ID: 13654385<br>CAHE_0544 Gene ID: 13654662<br>CAHE_p0026 Gene ID: 13654955<br>CAHE_p0027 Gene ID: 13654956 |
| location of amplicon                                      | D | OK |                                                                                                                                                                                                                                                                                                                                                                                                                                                                     |
| amplicon length                                           | E | OK | AL022_RS02415- <i>GyrB</i> 195bp<br>AL022_RS01165- <i>GroEL</i> 249bp<br>CAHE_0339 250 bp<br>CAHE_0131 191 bp<br>CAHE_0338 197 bp<br>AL022_RS01110 213 bp<br>CAHE_0242 174 bp<br>CAHE_0130 150 bp<br>CAHE_0475 188 bp<br>CAHE_0565 250 bp<br>CAHE_0102 225 bp<br>CAHE_p0027 182 bp<br>CAHE_0335 195 bp<br>CAHE_p0026 157 bp<br>CAHE_0132 171 bp<br>CAHE_0678 151 bp<br>CAHE_0544 233 bp                                                                             |
| in silico specificity screen (blast, etc)                 | E | OK | done                                                                                                                                                                                                                                                                                                                                                                                                                                                                |
| Pseudogenes, retropseudogenes or other homologs?          | D |    |                                                                                                                                                                                                                                                                                                                                                                                                                                                                     |
| sequence alignment                                        | D |    |                                                                                                                                                                                                                                                                                                                                                                                                                                                                     |
| secondary structure analysis of amplicon                  | D | OK |                                                                                                                                                                                                                                                                                                                                                                                                                                                                     |
| location of each primer by exon or intron (if applicable) | E |    | not relevant                                                                                                                                                                                                                                                                                                                                                                                                                                                        |
| What splice variants are targeted?                        | E |    | not relevant                                                                                                                                                                                                                                                                                                                                                                                                                                                        |
| <b>qPCR oligonucleotides</b>                              |   |    |                                                                                                                                                                                                                                                                                                                                                                                                                                                                     |
| primer sequences                                          | E | OK | see Supplementary Table                                                                                                                                                                                                                                                                                                                                                                                                                                             |

|                                                           |   |    |                                                                                                                                                                                                                                                                                                                         |
|-----------------------------------------------------------|---|----|-------------------------------------------------------------------------------------------------------------------------------------------------------------------------------------------------------------------------------------------------------------------------------------------------------------------------|
| RTPrimerdb identification number                          | D | OK | not relevant, as all of them are unpublished newly designed primers                                                                                                                                                                                                                                                     |
| probe sequences                                           | D | OK | not relevant, as no probes were used                                                                                                                                                                                                                                                                                    |
| location and identity of any modifications                | E | OK | no modifications                                                                                                                                                                                                                                                                                                        |
| manufacturer of oligonucleotides                          | D | OK | Microsynth                                                                                                                                                                                                                                                                                                              |
| purification method                                       | D | OK | desalted                                                                                                                                                                                                                                                                                                                |
| <b>qPCR protocol</b>                                      |   |    |                                                                                                                                                                                                                                                                                                                         |
| complete reaction conditions                              | E | OK | See main manuscript                                                                                                                                                                                                                                                                                                     |
| reaction volume and amount of cDNA/DNA                    | E | OK | See main manuscript                                                                                                                                                                                                                                                                                                     |
| primer, (probe), Mg <sup>++</sup> and dNTP concentrations | E | OK | See main manuscript                                                                                                                                                                                                                                                                                                     |
| polymerase identity and concentration                     | E | OK | See main manuscript                                                                                                                                                                                                                                                                                                     |
| buffer/kit identity and manufacturer                      | E | OK | See main manuscript                                                                                                                                                                                                                                                                                                     |
| exact chemical constitution of the buffer                 | D | OK | See manual Brilliant III Ultra-Fast SYBR Green qPCR Master Mix (Agilent, Vienna, Austria)                                                                                                                                                                                                                               |
| Additives (SYBR green I, DMSO, etc.)                      | E | OK | SYBR Green is contained in the mastermix; no further additives                                                                                                                                                                                                                                                          |
| manufacturer of plates/tubes and catalog number           | D | OK | MicroAmp optical tube (0.2 µl; Applied Biosystems by life technologies)                                                                                                                                                                                                                                                 |
| complete thermocycling parameters                         | E | OK | See main manuscript                                                                                                                                                                                                                                                                                                     |
| reaction setup (manual/robotic)                           | D | OK | manual                                                                                                                                                                                                                                                                                                                  |
| manufacturer of qpcr instrument                           | E | OK | Stratagene Mx3000P real-time PCR System (Agilent Technologies, Santa Clara, USA)                                                                                                                                                                                                                                        |
| <b>qPCR validation</b>                                    |   |    |                                                                                                                                                                                                                                                                                                                         |
| evidence of optimisation (from gradients)                 | D | OK | done                                                                                                                                                                                                                                                                                                                    |
| specificity (gel, sequence, melt, or digest)              | E | OK | melting curve                                                                                                                                                                                                                                                                                                           |
| for SYBR green, Cq of the NTC                             | E | OK | no amplification                                                                                                                                                                                                                                                                                                        |
| standard curves with slope and y-intercept                | E | OK | done                                                                                                                                                                                                                                                                                                                    |
| PCR efficiency calculated from slope                      | E | OK | GyrB 92.3%<br>GroEL 99.3%<br>CAHE_0339 98.2%<br>CAHE_0131 122%<br>CAHE_0338 102%<br>RI14_RS01100 99.2%<br>CAHE_0242 97.9%<br>CAHE_0130 92.6%<br>CAHE_0475 92%<br>CAHE_0565 89%<br>CAHE_0102 95.6%<br>CAHE_p0027 103.9%<br>CAHE_0335 107.4%<br>CAHE_p0026 94.5%<br>CAHE_0132 101%<br>CAHE_0678 102.3%<br>CAHE_0544 92.7% |

|                                                          |   |    |                                                                                                                                                                                                                    |
|----------------------------------------------------------|---|----|--------------------------------------------------------------------------------------------------------------------------------------------------------------------------------------------------------------------|
| confidence interval for PCR efficiency or standard error | D |    | -                                                                                                                                                                                                                  |
| R2 of standard curve                                     | E | OK | Between 0.98 and 1 for all primer pairs                                                                                                                                                                            |
| linear dynamic range                                     | E | OK | 3 log scales tested                                                                                                                                                                                                |
| Cq variation at lower limit                              | E | OK | not tested                                                                                                                                                                                                         |
| confidence intervals throughout range                    | D |    |                                                                                                                                                                                                                    |
| evidence for limit of detection                          | E | OK | not tested                                                                                                                                                                                                         |
| If multiplex, efficiency and LOD of each assay.          | E | OK | not relevant, no multiplexing                                                                                                                                                                                      |
| <b>data analysis</b>                                     |   |    |                                                                                                                                                                                                                    |
| qPCR analysis program (source, version)                  | E |    | Stratagene Mx3000P real-time PCR System (Agilent Technologies, Santa Clara, USA)                                                                                                                                   |
| Cq method determination                                  | E |    | Stratagene Mx3000P real-time PCR System settings (baseline subtracted curve fit, single threshold, automatically calculated). Threshold manually curated for maximum efficiency within linear range for each plate |
| outlier identification and disposition                   | E | OK | done                                                                                                                                                                                                               |
| results of NTCs                                          | E | OK | no amplificate                                                                                                                                                                                                     |
| justification of number and choice of reference genes    | E | OK | Assumption that <i>gyrB</i> and <i>groEL</i> are constantly expressed. <i>GroEL</i> is the best-conserved chaperone, single copy.                                                                                  |
| description of normalisation method                      | E | OK | relative quantification – copy number of reference genes per sample normalised against copy number of reference mRNAs within the same sample                                                                       |
| number and concordance of biological replicates          | D | OK | 3 biological replicates                                                                                                                                                                                            |
| number and stage (RT or qPCR) of technical replicates    | E | OK | 2 technical replicates for all samples                                                                                                                                                                             |
| repeatability (intra-assay variation)                    | E | OK | repeatable                                                                                                                                                                                                         |
| reproducibility (inter-assay variation, %CV)             | D | OK | not determined (strongly recommended for clinical/diagnostic applications, but not other assays)                                                                                                                   |
| power analysis                                           | D | OK |                                                                                                                                                                                                                    |
| statistical methods for result significance              | E | OK | done                                                                                                                                                                                                               |
| software (source, version)                               | E | OK | R software                                                                                                                                                                                                         |
| Cq or raw data submission using RDML                     | D |    |                                                                                                                                                                                                                    |
| E = essential,<br>D = recommended                        |   |    |                                                                                                                                                                                                                    |
